# Supplementary material
Source: PubMed Central journal article supplement (PMC5797479)
Supplement: NIHMS74839-supplement-Supplemental_Material.pdf [file NIHMS74839-supplement-Supplemental_Material.pdf]

**REFERENCES**

- E1. Crow YJ. Type I interferonopathies: a novel set of inborn errors of immunity. *Ann N Y Acad Sci* 2011;1238:91-8.
- E2. Thurlings RM, Boumans M, Tekstra J, van Roon JA, Vos K, van Westing DM, et al. Relationship between the type I interferon signature and the response to rituximab in rheumatoid arthritis patients. *Arthritis Rheum* 2010;62(12):3607-14.

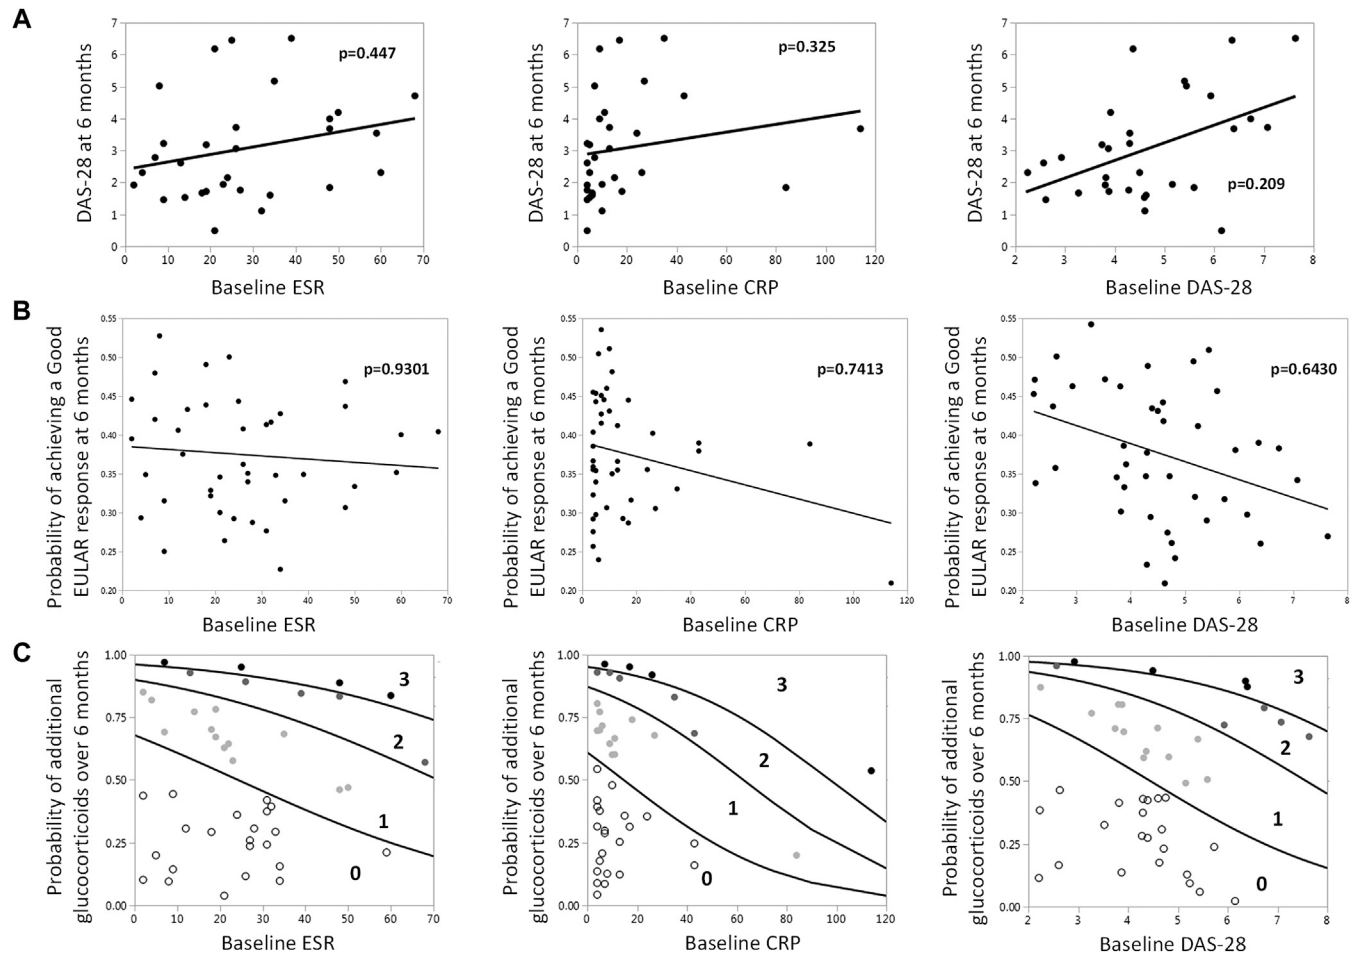

**FIG E1.** Additional prediction model figures. Patients with early RA ( $n = 32$ ) had baseline ESR levels, CRP levels, and DAS28 scores calculated, and disease activity parameters were assessed at 6 months after diagnosis and initiation of treatment. **A**, Plot depicts age- and sex-corrected multiple regression between baseline ESR levels, CRP levels, and DAS28 scores and DAS28 scores at 6 months. **B**, Relationship between the probability of achieving a good EULAR response at 6 months and baseline ESR levels, CRP levels, and DAS28 scores (nominal logistic regression age and sex corrected). **C**, Plot depicts the relationship between the probability of receiving additional glucocorticoids in the first 6 months after diagnosis and baseline ESR levels, CRP levels, and DAS28 scores. Numbers denote numbers of additional glucocorticoid administrations (0-3) in the first 6 months. Baseline ESR levels, CRP levels, and DAS28 scores did not significantly predict additional glucocorticoid requirements ( $P = .345$ ,  $P = .615$ , and  $P = .699$ , respectively; ordinal logistic regression with bootstrap probabilities included).

**TABLE E1.** Cohort demographics and clinical characteristics

|                                                        | Patients with early RA | Patients with established RA | Patients with established SLE | Healthy control subjects | Difference between groups |
|--------------------------------------------------------|------------------------|------------------------------|-------------------------------|--------------------------|---------------------------|
| No.                                                    | 50                     | 25                           | 23                            | 23                       | —                         |
| Age (y), median (range)                                | 57.5 (30-91)           | 67.5 (28-81)                 | 55 (33-69)                    | 36.5 (25-62)             | $P < .0001^*$             |
| Male/female ratio                                      | 2:3                    | 2:3                          | 1:8                           | 1:1                      | $P < .0001^*$             |
| Disease duration (y), median (range)                   | —                      | 10 (1-22)                    | 10 (1-35)                     | —                        | —                         |
| DAS28 score, median (range)                            | 4.36 (1.33-7.63)       | 5.25 (2.6-8.43)              | —                             | —                        | $P = .104^\ddagger$       |
| CRP (mg/L), median (range)                             | 7.5 (0-114)            | 8 (0-96)                     | 5 (0-38)                      | —                        | $P = .135^*$              |
| ESR (mm/h), median (range)                             | 22.5 (2-68)            | 25 (2-61)                    | 27 (5-109)                    | —                        | $P = .381^*$              |
| RF <sup>+</sup> and/or anti-CCP <sup>+</sup> , no. (%) | 36 (72)                | 20 (87)                      | —                             | —                        | $P = .235^\ddagger$       |
| Patients receiving oral DMARDs, no. (%)§               | 0                      | 21 (91)                      | 20 (87)                       | —                        | —                         |
| Patients receiving biological DMARDs, no. (%)§         | 0                      | 0 (0)                        | 0 (0)                         | —                        | —                         |
| Patients receiving glucocorticoids, no. (%)§           | 0                      | 3 (13)                       | 6 (26)                        | —                        | —                         |

**Early RA only**

|                                               |              |
|-----------------------------------------------|--------------|
| Tender joint count, median (range)            | 4 (0-25)     |
| Swollen joint count, median (range)           | 2 (1-24)     |
| Patient VAS score, median (range)             | 57 (8-100)   |
| Duration of symptoms (wk), median (range)     | 12 (3-52)    |
| Early morning stiffness (min), median (range) | 52.5 (0-380) |

Data are expressed as medians (ranges) or numbers (percentages). Notably, there was no significant differences between early and established RA for age and sex ( $P > .2$ , Tukey *post hoc* multiple comparison test).

*anti-CCP*, Anti-cyclic citrullinated peptide antibody; *RF*, rheumatoid factor; *VAS*, visual analog scale.

\*One-way ANOVA.

†Mann-Whitney *U* test.

‡ $\chi^2$  Test.

§Drug history data were recorded at the time of baseline IGS measurement.

TABLE E2. RT-PCR

| Gene          | Primer                  |                         | Roche Universal ProbeLibrary no. |
|---------------|-------------------------|-------------------------|----------------------------------|
|               | Forward                 | Reverse                 |                                  |
| <i>MxA</i>    | GGAGAACATGGTGTGATAATCCT | CACCGTGACACTGGGATTC     | 83                               |
| <i>ISG15</i>  | GCGAACTCATCTTTGCCAGTA   | CCAGCATCTTCACCGTCAG     | 23                               |
| <i>OAS1</i>   | CATCCGCCTAGTCAAGCACT    | CAGGAGCTCCAGGGCATAAC    | 87                               |
| <i>IFI6</i>   | CGGGCTGAAGATTGCTTCT     | AAAGCGATACCGCCTTCTG     | 25                               |
| <i>IFI44L</i> | TGACACTATGGGGCTAGATGG   | GAATGCTCAGGTGTAATTGGTTT | 15                               |

Forward and reverse gene-specific primer sequences used for RT-PCR and probe numbers from the Roche Universal ProbeLibrary.
